# Supplementary material for: Soil Microbial Community Responses to Different Management Strategies in Almond Crop
Source: MDPI journal article supplement (doi:10.3390/jof9010095), 2023-01-10

Figure S2: Venn diagram with shared and exclude genera. Bacterial (A) and fungal (B) genera present in the three soil replicas across managements.

### A. Bacteria

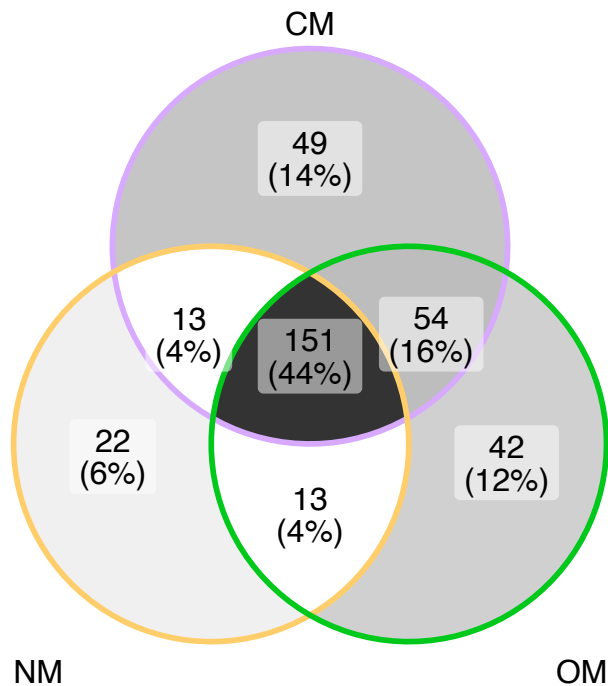

### B. Fungi

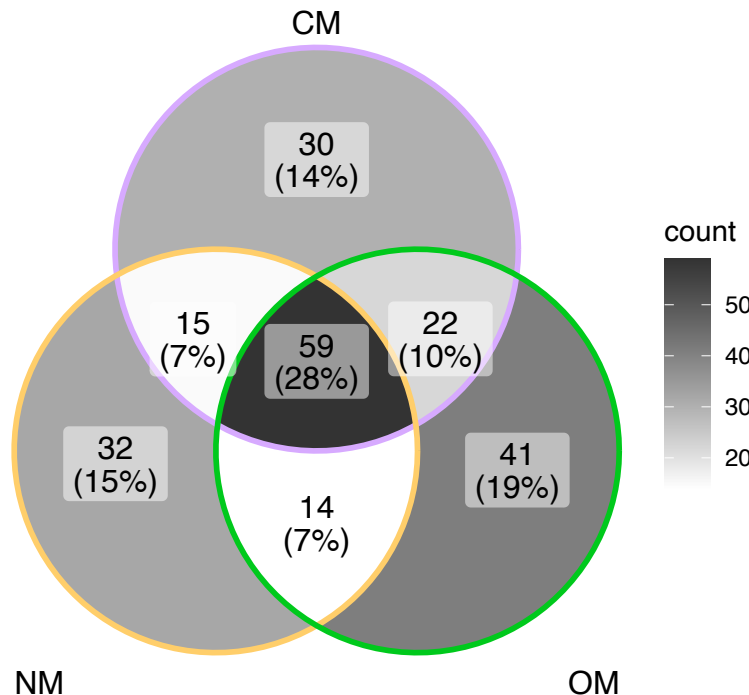

Supplement: s1 [file s1]
