# Supplementary material for: Soil Microbial Community Responses to Different Management Strategies in Almond Crop
Source: J Fungi (Basel). 2023 Jan 10;9(1):95. doi: 10.3390/jof9010095 (PMC9864756; doi:10.3390/jof9010095)
Supplement: Supplementary file 1 [file jof-09-00095-s001.zip]

Archive with 5 entries (5 files):
- FigureS1.pdf
- FigureS2_vennDiagram.pdf
- TableS1.xlsx
- TableS2_rel-ab_fungi.xlsx
- TableS3_rel-ab_bact.xlsx
