# Supplementary figures and images for: Soil Microbial Community Responses to Different Management Strategies in Almond Crop
Source: MDPI journal article supplement (doi:10.3390/jof9010095), 2023-01-10

Figure S1: Rarefaction curves. Rarefaction curves on (A) 16S and (B) ITS datasets.

A

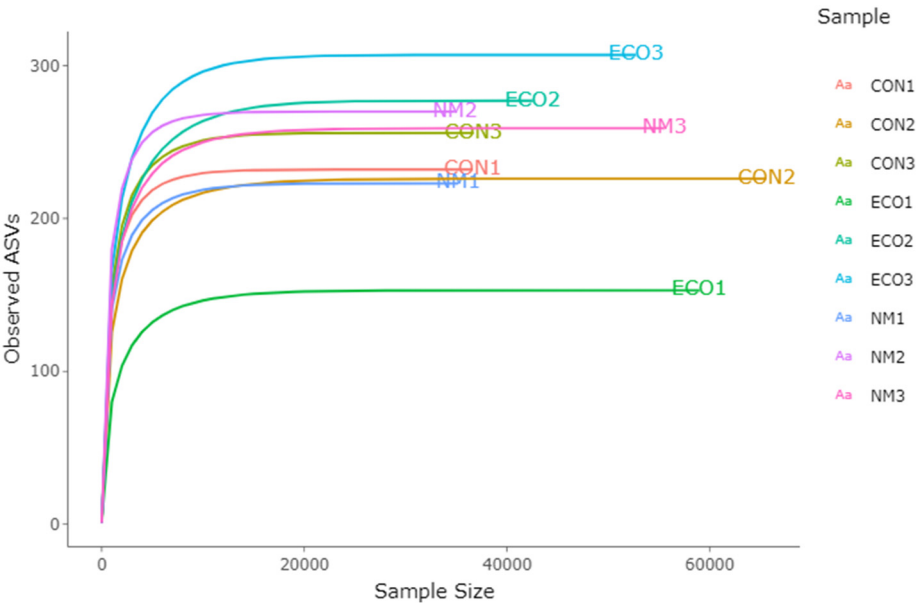

B

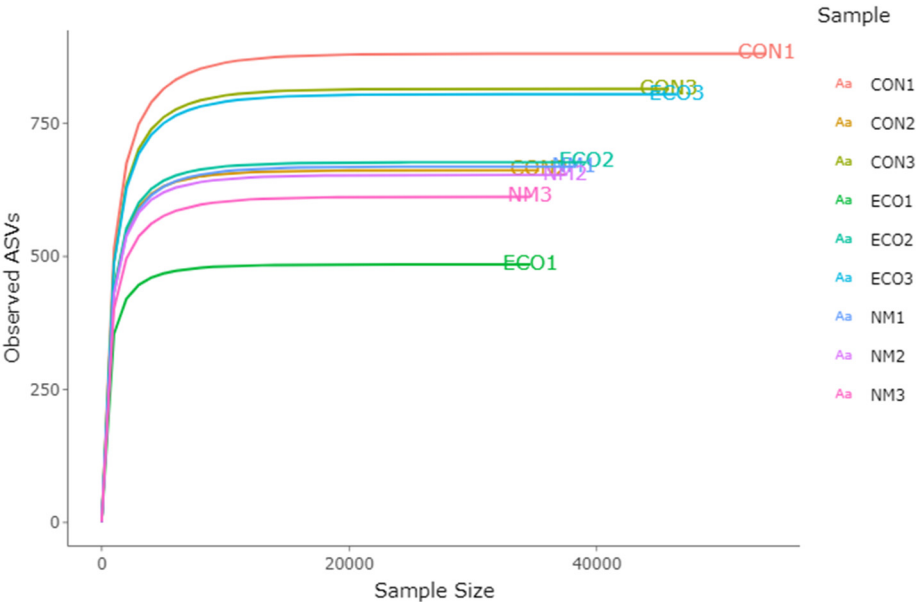

Supplement: s1 [file s1]
